# Supplementary material for: Growth of rutile TiO2on the convex surface of nanocylinders: from nanoneedles to nanorods and their electrochemical properties
Source: Royal Society of Chemistry journal article supplement (doi:10.1039/c3nr04308h), 2014-01-01
Supplement: c3nr04308h1.pdf [file c3nr04308h1.pdf]

## Supporting information

### Growth of Rutile $\text{TiO}_2$ on Convex Surface of Nanocylinder: From Nanoneedles to Nanorods and Their Electrochemical Properties

Junhua Kong,<sup>a</sup> Yuefan Wei,<sup>b</sup> Chenyang Zhao,<sup>c</sup> Meng Yew Toh,<sup>c</sup> Wu Aik Yee,<sup>a</sup> Dan Zhou,<sup>a</sup>  
Si Lei Phua,<sup>c</sup> Yuliang Dong,<sup>c</sup> and Xuehong Lu<sup>c,\*</sup>

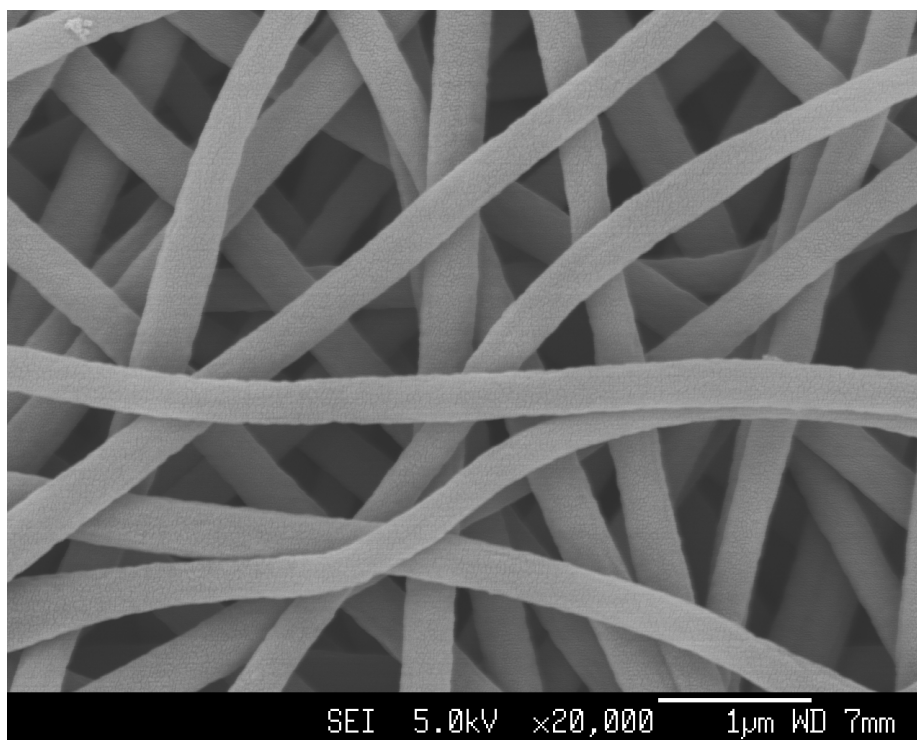

**Fig. S1.** FESEM image of carbonized electrospinning-derived carbon nanofibers, showing the nanofibrous morphology with uniform diameter and long length as well as the rough surface.

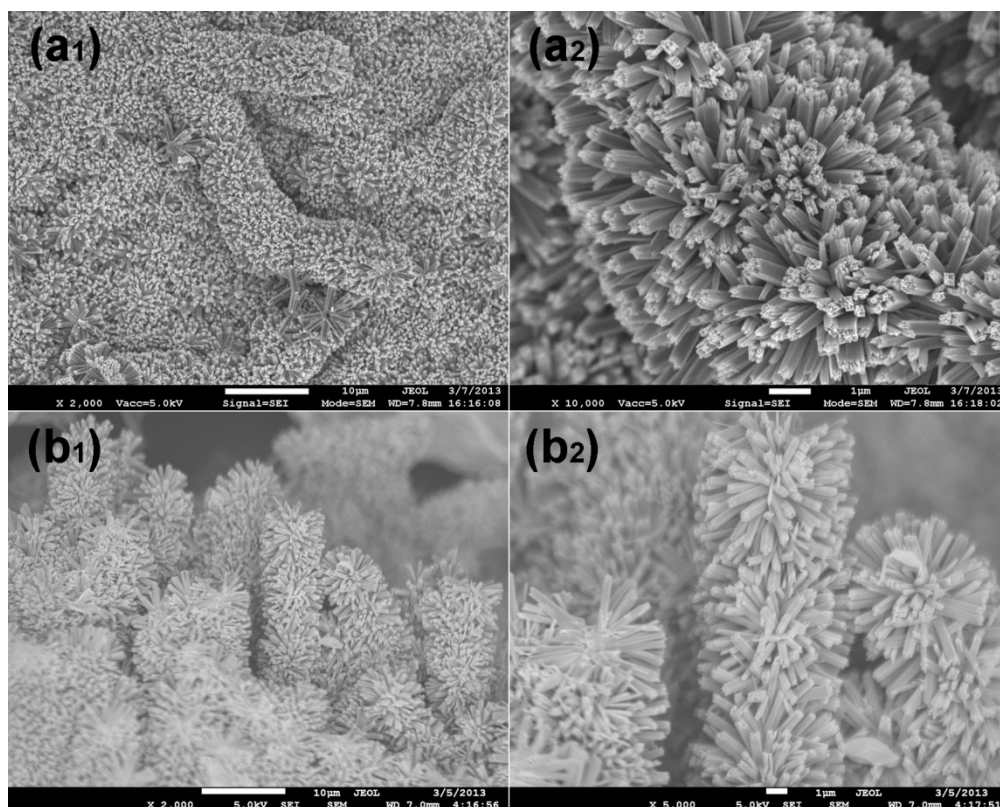

**Fig. S2.** The FESEM images of TiO<sub>2</sub> nanostructures grown on carbon nanofibers using (a) titanium (IV) isopropoxide and (b) titanium (IV) butoxide as precursors, showing the morphology and dimension of TiO<sub>2</sub> which is of separated nanorods with diameter of tens of nanometers.

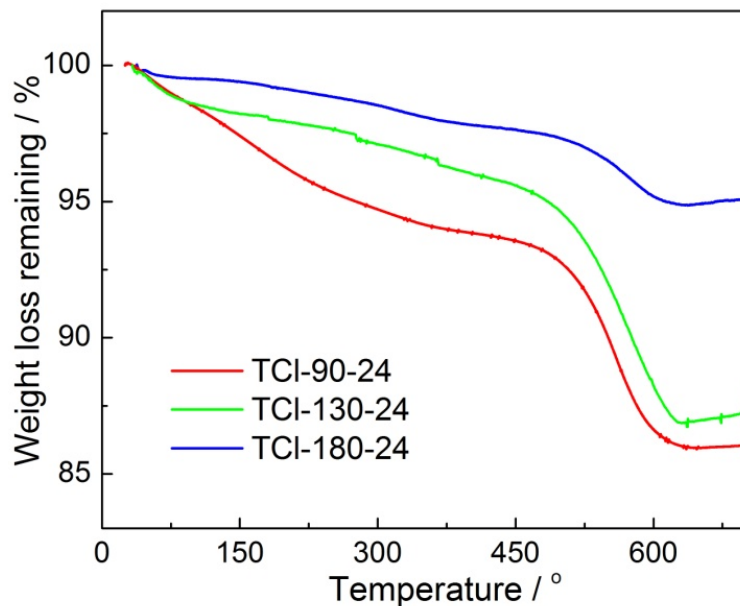

**Fig. S3.** TGA curves of the samples from 24 hrs' hydrothermal growth at 90 °C (TiO<sub>2</sub>-90-24), 130 °C (TiO<sub>2</sub>-130-24) and 180 °C (TiO<sub>2</sub>-180-24), showing that the content of TiO<sub>2</sub> is higher than 85 wt% in all samples.

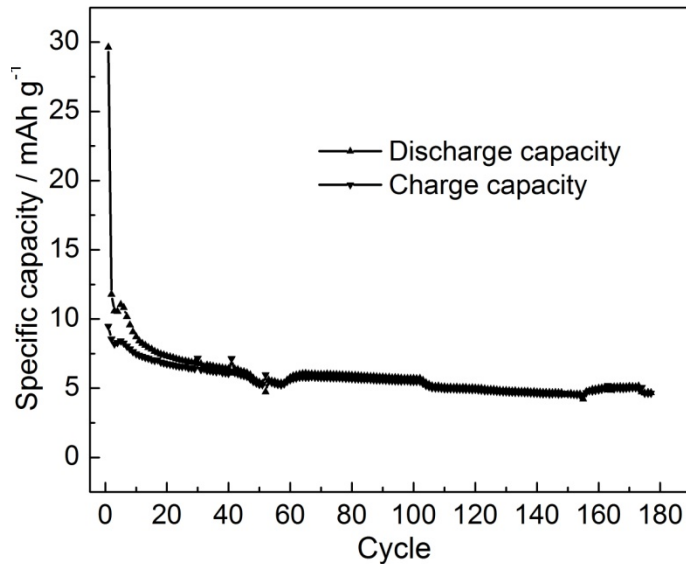

**Fig. S4.** The cycling capacity of pure carbon nanofibers (CNFs) at current rate of 50 mA g<sup>-1</sup> and voltage range of 1.0-2.8 V. It is shown that the capacity of CNFs is as low as about 5 mAh g<sup>-1</sup>, indicating the electrochemical inactivity of CNFs within the voltage range of 1.0-2.8 V.

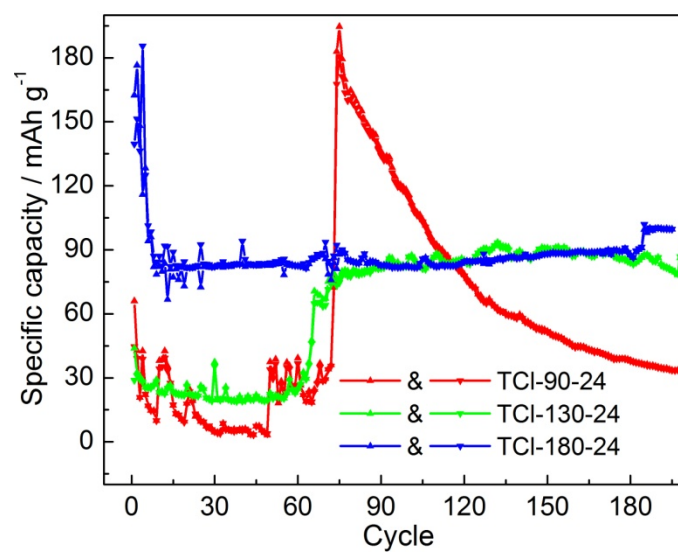

**Fig. S5.** The cycling capacity of the samples from 24 hrs' hydrothermal growth at 90 °C (TiO<sub>2</sub>-90-24), 130 °C (TiO<sub>2</sub>-130-24) and 180 °C (TiO<sub>2</sub>-180-24). The capacity shows severe instability along with the cycles.
